# Supplementary material for: Resistive Memory for Harsh Electronics: Immunity to Surface Effect and High Corrosion Resistance via Surface Modification
Source: PubMed Central journal article supplement — Sci Rep. 2014 Mar 18;4:4402. doi: 10.1038/srep04402 (PMC3957131; doi:10.1038/srep04402), 2014-03-18
Supplement: srep04402-s1.pdf [file srep04402-s1.pdf]

**Supplementary Information for:**

**Resistive Memory for Harsh Electronics: Immunity to Surface Effect and High Corrosion Resistance *via* Surface Modification**

**Teng-Han Huang,<sup>1</sup> Po-Kang Yang,<sup>1</sup> Der-Hsien Lien,<sup>1</sup> Chen-Fang Kang,<sup>1</sup> Meng-Lin Tsai,<sup>1</sup>**

**Yu-Lun Chueh,<sup>2</sup> and Jr-Hau He<sup>1,\*</sup>**

<sup>1</sup>Institute of Photonics and Optoelectronics & Department of Electrical Engineering, National Taiwan University, Taipei 10617, Taiwan, ROC.

<sup>2</sup>Department of Materials Science and Engineering, National Tsing Hua University, Hsinchu 30013, Taiwan, ROC.

\*E-mail: [jhhe@cc.ee.ntu.edu.tw](mailto:jhhe@cc.ee.ntu.edu.tw)

### Top-view and cross-sectional SEM images

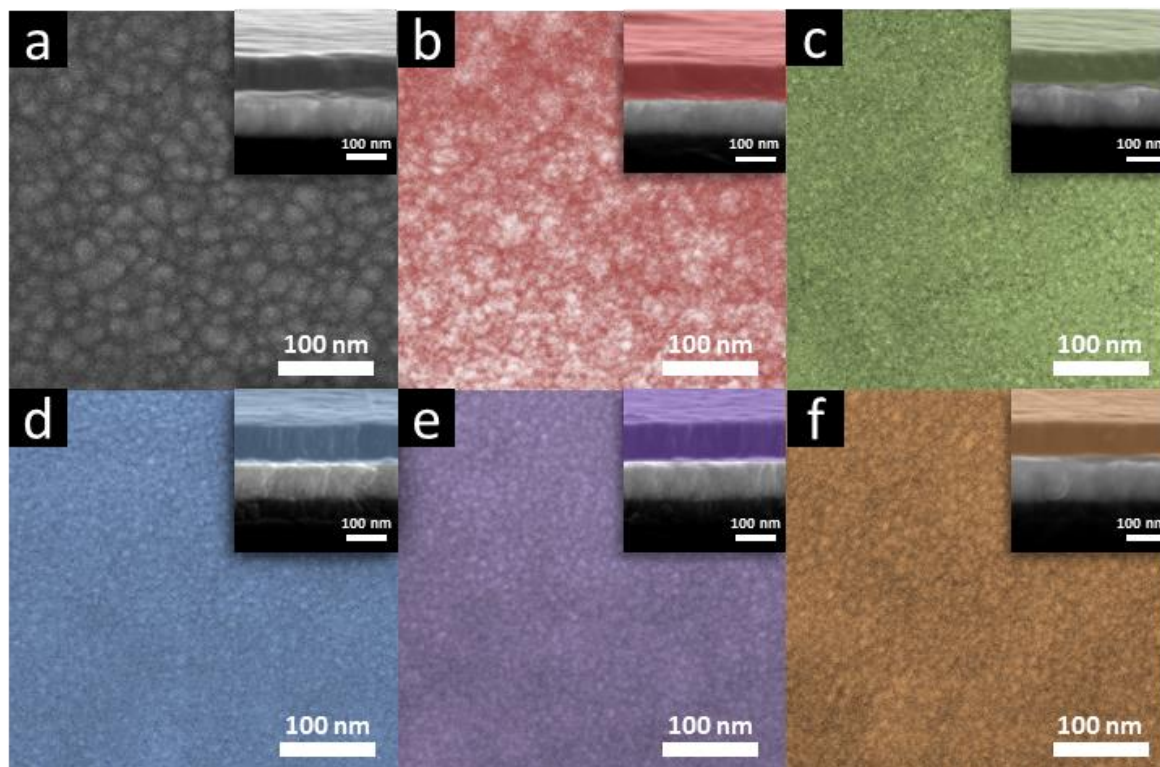

**Figure S1.** The surface morphologies of (a) pristine ZnO and ZnO with (b) 2-min, (c) 5-min, (d) 10-min, (e) 20-min, and (f) 30-min fluorination by  $\text{CF}_4$  plasma. The insets show the cross-sectional SEM images. The thicknesses of ZnO thin films in the insets are (a) 100 nm, (b) 97 nm, (c) 95 nm, (d) 93 nm, (e) 90 nm, and (f) 85 nm.

## Statistics of the thicknesses of ZnO thin films

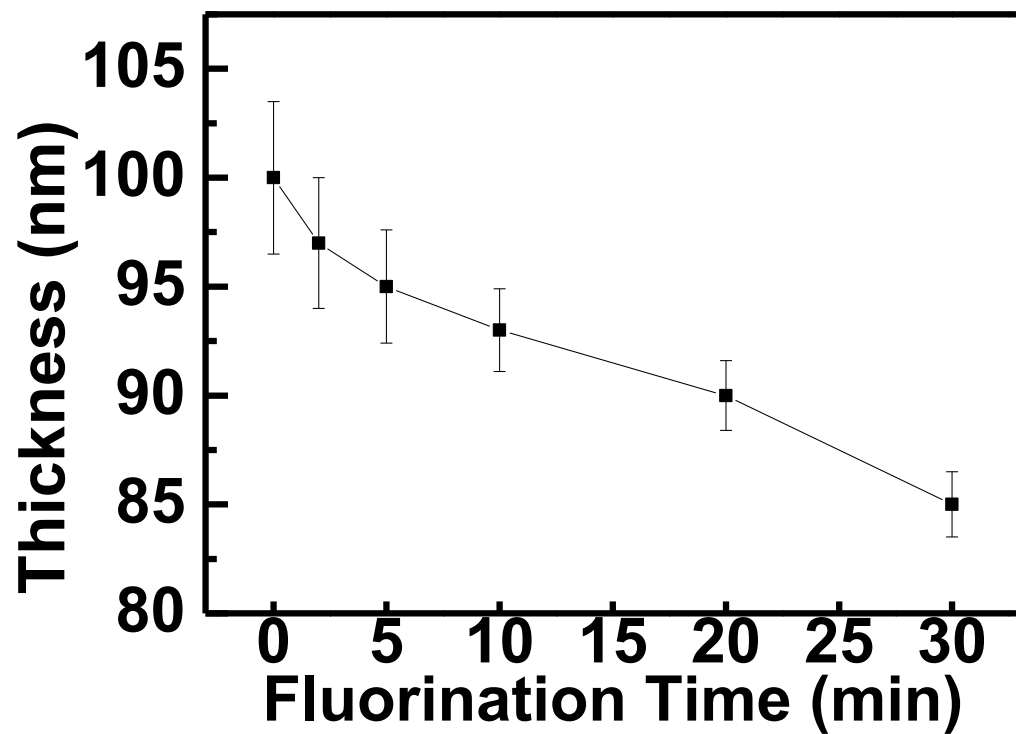

**Figure S2.** The dependence of the thicknesses of  $\text{CF}_4$  plasma-treated ZnO thin films on the fluorination time measured from cross-sectional SEM images.

### Chemical composition with depth of the F-modified ZnO thin films

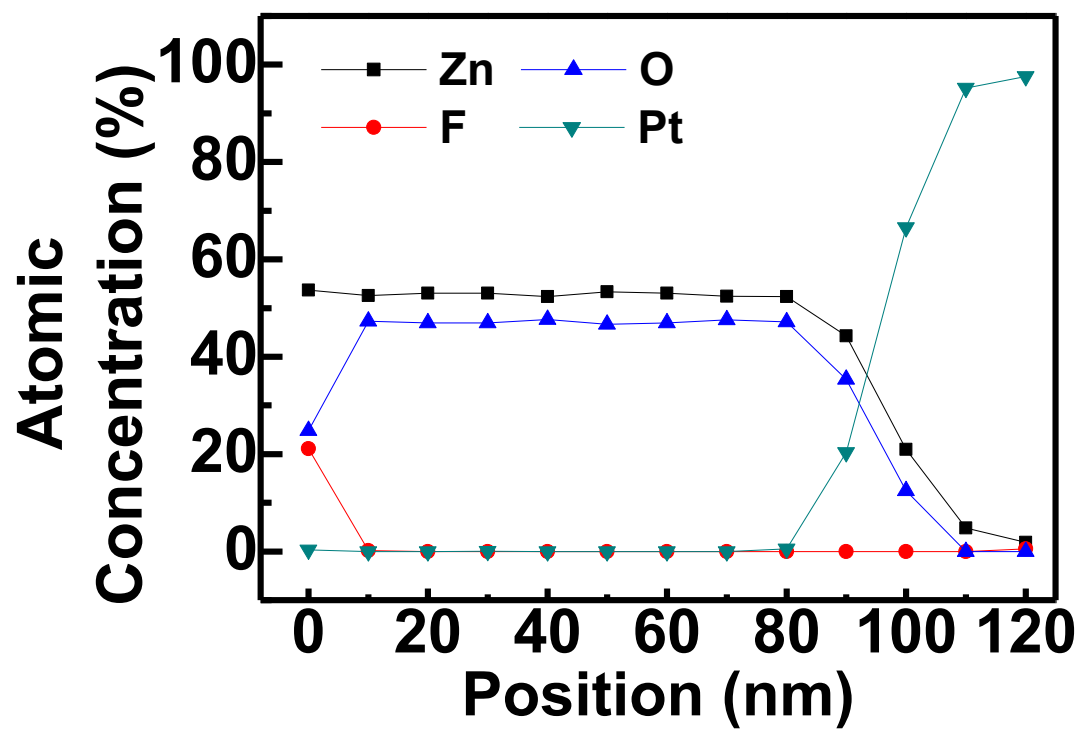

**Figure S3.** The depth profile of atomic concentration for four elements (Zn, O, F, and Pt) in the F-modified ZnO thin film by XPS characterization.

### Forming process of the derived structure

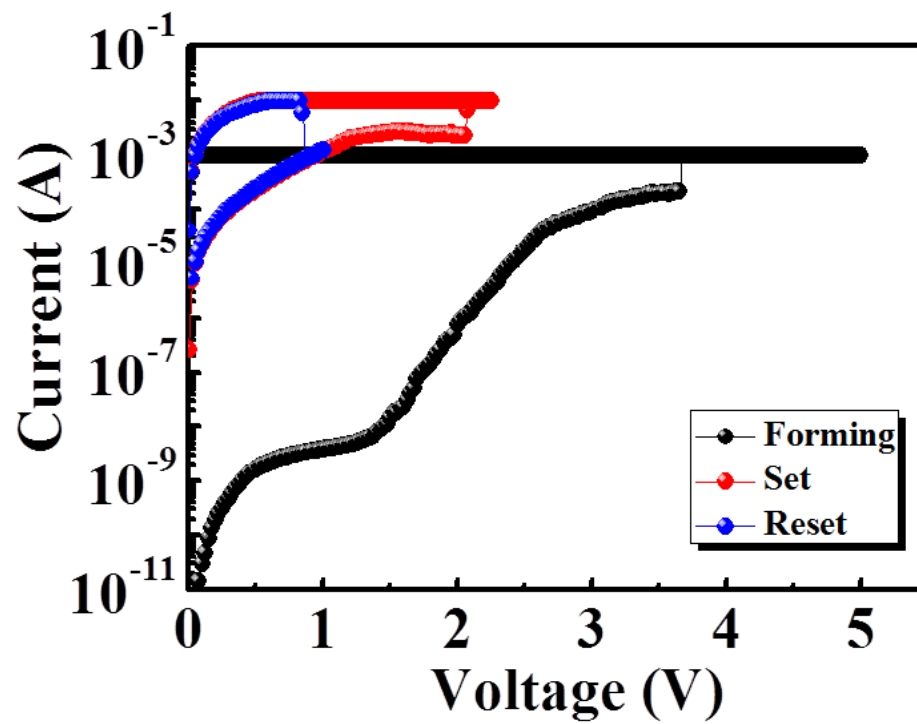

**Figure S4.** A complete switching cycle of the Pt/ZnO/Pt device.

Device yields under different operation modes

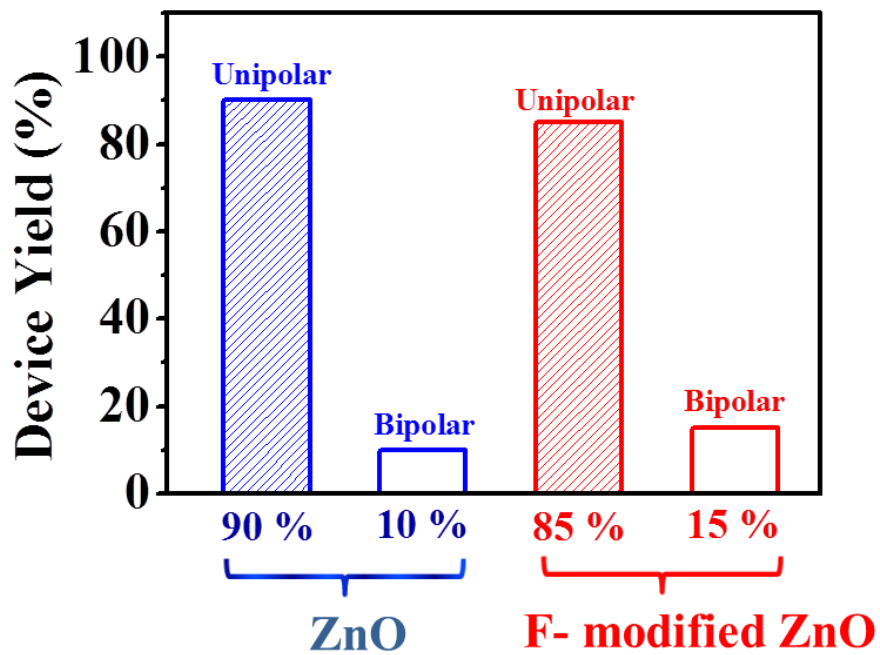

Figure S5. Device switching yield (left) ZnO RRAM (right) F-modified RRAM.

Dependence of the set ( $V_{set}$ ) and reset voltages ( $V_{reset}$ ) on the acid vapor treatment

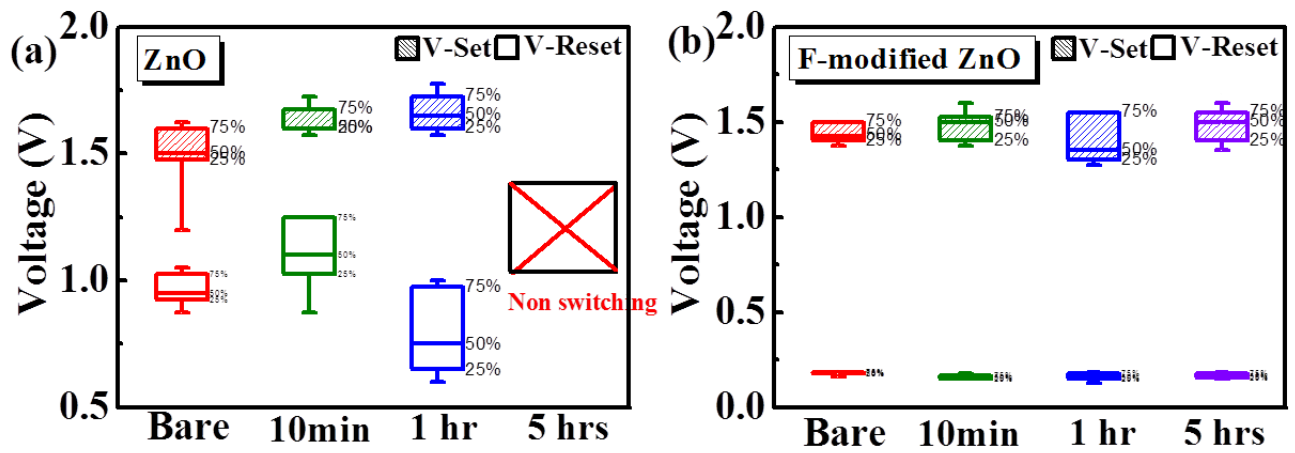

**Figure S6.** Distributions of operation voltages on ZnO (left) and F-modified RRAM devices (right) with acid vapor treatments.

### Dependence of forming voltages on the acid vapor treatment

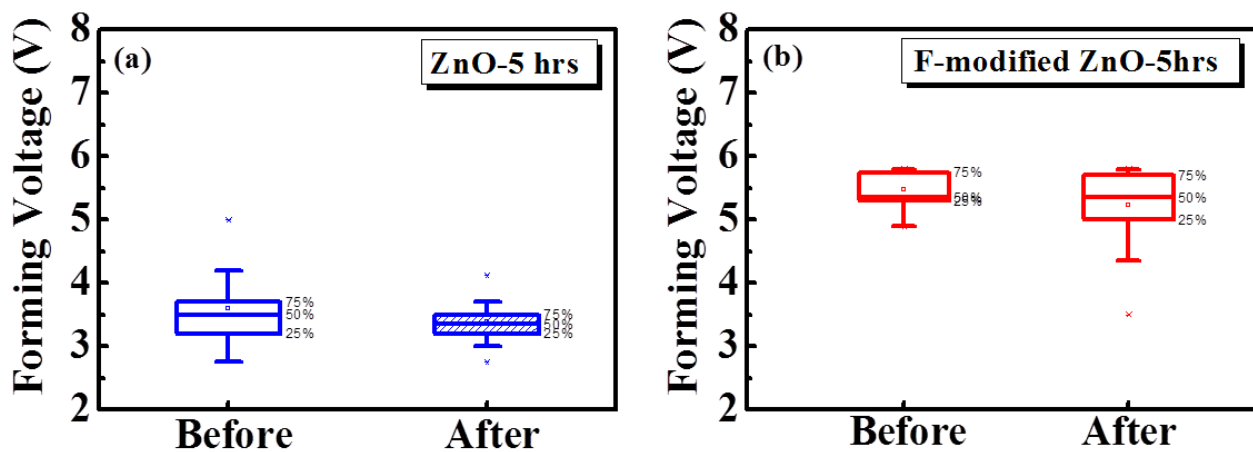

**Figure S7.** Distributions of forming voltages on pristine ZnO (left) and F-modified RRAM devices (right) before and after acid vapor treatment.



Evaluation of the limit on the F-modified ZnO device

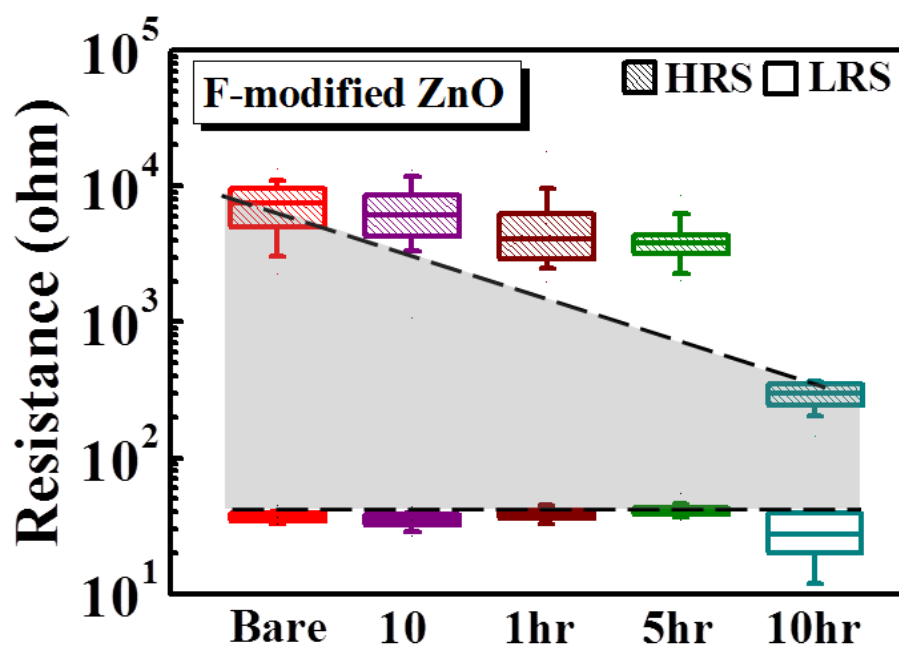

Figure S8. Durability limit of the F-modified RRAM device under acid vapor treatment.
